# Supplementary material for: RETRACTED ARTICLE: Kinase profiling of liposarcomas using RNAi and drug screening assays identified druggable targets
Source: Springer Nature journal article supplement (doi:10.1186/s13045-017-0540-x), 2017-11-13
Supplement: MOESM1 [file 15220368]

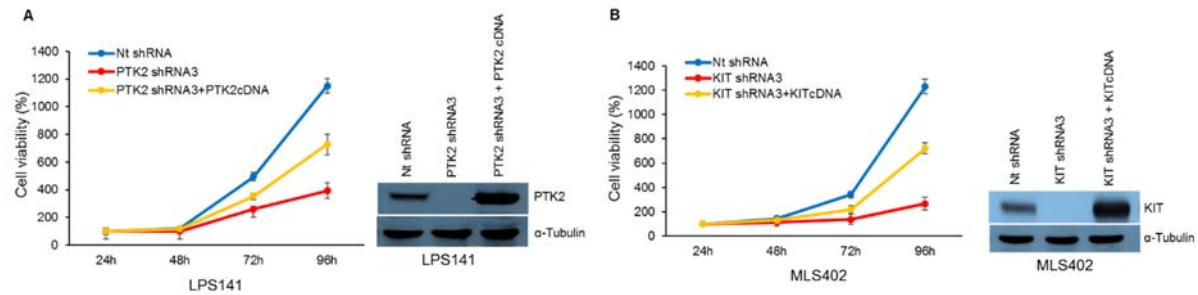

**Figure S1: Exogenous expression of kinase gene rescues the inhibition of proliferation.**

Exogenous overexpression of coding region of *PTK2* and *KIT* gene in stable 3'UTR knockdown *PTK2*-shRNA3 LPS141 and *KIT*-shRNA3 MLS402 cells, respectively. Western blotting established the efficient knockdown and overexpression of *PTK2* in LPS141 (A) and *KIT* in MLS402 (B) cells. Cell viability measured by MTT assay at different time points for LPS141 (A) and MLS402 (B) cells showed rescue of cell proliferation. ( $\alpha$ -tubulin, loading control)



|              | UDLPS | WDLPS |       |       |       | DDLPS  |           |       |       | MLPS   | PLPS   |
|--------------|-------|-------|-------|-------|-------|--------|-----------|-------|-------|--------|--------|
| Drug Name    | SW872 | T449  | T1000 | T778  | GOT-3 | LPS141 | FU-DDLS-1 | LP6   | SA-4  | MLS402 | LiSa-2 |
| CEP-701      | 1000  | 1000  | NA    | 1000  | 401   | 1000   | NA        | 1000  | 1000  | 227    | NA     |
| CHIR-258     | 10000 | 7080  | 5410  | 10000 | 10000 | 10000  | 3342      | 10000 | 10000 | 760    | 9016   |
| CHIR-265     | 10000 | 10000 | 6142  | 10000 | 10000 | 4899   | 6329      | 10000 | 92    | 1661   | 10000  |
| CHIR-99021   | 10000 | 10000 | 7686  | 10000 | 10000 | 8129   | 10000     | 10000 | 10000 | 10000  | 10000  |
| CI-1033      | 10000 | 10000 | 9095  | 10000 | 10000 | 10000  | 8763      | 10000 | 10000 | 10000  | 10000  |
| CP-690550    | 10000 | 10000 | 10000 | 10000 | 10000 | 10000  | 10000     | 10000 | 10000 | 10000  | 10000  |
| CPI-267703   | 10000 | 5249  | NA    | 10000 | 2819  | 5013   | NA        | 1001  | 10000 | 4366   | NA     |
| Crenolanib_2 | 10000 | 10000 | NA    | 9334  | 3091  | 10000  | NA        | 4170  | 10000 | 4787   | NA     |
| Crenolanib_3 | 10000 | 9334  | 9954  | 4787  | 4678  | 8512   | 1987      | 10000 | 10000 | 2755   | 10000  |
| Crenolanib   | 10000 | 10000 | 9485  | 10000 | 6608  | 10000  | 2045      | 10000 | 10000 | 5249   | 10000  |
| CYC-202      | 10000 | 10000 | 10000 | 10000 | 10000 | 10000  | 10000     | 10000 | 10000 | 10000  | 10000  |
| Cytopia      | 10000 | 10000 | NA    | 1350  | 1661  | 4899   | NA        | 10000 | 10000 | 6311   | NA     |
| Dasatinib_2  | 1000  | 1000  | 1000  | 146   | 280   | 65     | 1000      | 275   | 1000  | 89     | 1000   |
| Dasatinib_3  | 1000  | 1000  | 1000  | 408   | 388   | 95     | 1000      | 747   | 1000  | 179    | 1000   |
| Dasatinib    | 1000  | 1000  | 1000  | 57    | 79    | 90     | 1000      | 934   | 1000  | 55     | 1000   |
| EKB-569      | 10000 | 10000 | 2676  | 10000 | 10000 | 10000  | 8925      | 10000 | 10000 | 5130   | 10000  |
| Elesclomol   | 14    | 11    | 18    | 5     | 14    | 16     | 11        | 12    | 11    | 16     | 257    |
| Erlotinib_2  | 10000 | 4787  | 10000 | 5496  | 4366  | 10000  | 10000     | 10000 | 10000 | 3163   | 10000  |
| Erlotinib    | 6919  | 8319  | 10000 | 6167  | 10000 | 6027   | 9364      | 10000 | 10000 | 4899   | 10000  |
| Flavopiridol | 934   | 1699  | 116   | 390   | 3312  | 604    | 279       | 1779  | 2090  | 576    | 66     |
| GDC-0449     | 10000 | 10000 | 10000 | 10000 | 10000 | 10000  | 10000     | 10000 | 10000 | 10000  | 10000  |
| GDC-0879     | 10000 | 10000 | 10000 | 10000 | 10000 | 10000  | 10000     | 10000 | 10000 | 10000  | 10000  |
| GDC-0941_2   | 3021  | 1821  | 440   | 1480  | 1381  | 1289   | 1067      | 2240  | 4170  | 892    | 3320   |
| GDC-0941     | 2240  | 1203  | 609   | 1001  | 1260  | 1260   | 467       | 1123  | 3163  | 795    | 13     |
| Gefitinib_2  | 10000 | 10000 | 10000 | 10000 | 10000 | 10000  | 10000     | 10000 | 10000 | 10000  | 10000  |
| Gefitinib    | 10000 | 10000 | 10000 | 10000 | 10000 | 10000  | 10000     | 10000 | 10000 | 10000  | 10000  |
| Go6976       | 10000 | 1951  | NA    | 1863  | 348   | 8129   | NA        | 3982  | 10000 | 956    | NA     |
| GS-548233    | 5000  | 5000  | NA    | 5000  | 5000  | 5000   | NA        | 5000  | 5000  | 5000   | NA     |
| GSK-1120212  | 10000 | 10000 | 794   | 10000 | 10000 | 10000  | 23        | 10000 | 18    | 10000  | 10000  |
| GSK-1838705A | 7763  | 2043  | 2544  | 3891  | 2819  | 4468   | 1606      | 10000 | 7080  | 3982   | 1128   |

|              | UDLPS | WDLPS |       |       |       | DDLPS  |           |       |       | MLPS   | PLPS   |
|--------------|-------|-------|-------|-------|-------|--------|-----------|-------|-------|--------|--------|
| Drug Name    | SW872 | T449  | T1000 | T778  | GOT-3 | LPS141 | FU-DDLS-1 | LP6   | SA-4  | MLS402 | LiSa-2 |
| 1904529A_2   | 10000 | 8711  | NA    | 10000 | 10000 | 10000  | NA        | 10000 | 10000 | 10000  | NA     |
| GSK-1904529A | 10000 | 10000 | 2783  | 10000 | 10000 | 10000  | 10000     | 10000 | 10000 | 10000  | 10000  |
| GSK-690693   | 10000 | 10000 | 10000 | 10000 | 10000 | 10000  | 10000     | 10000 | 10000 | 10000  | 10000  |
| GW-2580_2    | 10000 | 10000 | 10000 | 10000 | 10000 | 10000  | 10000     | 10000 | 10000 | 10000  | 10000  |
| GW-2580      | 10000 | 10000 | 10000 | 10000 | 10000 | 10000  | 412       | 10000 | 10000 | 10000  | 10000  |
| GW-786034_2  | 10000 | 10000 | NA    | 5371  | 9334  | 6311   | NA        | 10000 | 10000 | 10000  | NA     |
| GW-786034    | 10000 | 10000 | 9566  | 10000 | 10000 | 10000  | 3966      | 10000 | 10000 | 10000  | 10000  |
| H-89         | 10000 | 10000 | 10000 | 10000 | 10000 | 10000  | 6374      | 10000 | 10000 | 10000  | 5224   |
| HKI-272      | 5013  | 5755  | 10000 | 4899  | 2456  | 2755   | 885       | 10000 | 3312  | 2400   | 813    |
| Imatinib     | 10000 | 10000 | 10000 | 10000 | 1073  | 10000  | 10000     | 10000 | 10000 | 10000  | 10000  |
| INCB018424_2 | 10000 | 10000 | 10000 | 10000 | 10000 | 10000  | 10000     | 10000 | 10000 | 10000  | 10000  |
| INCB018424   | 10000 | 10000 | 10000 | 10000 | 10000 | 10000  | 10000     | 10000 | 10000 | 10000  | 10000  |
| INK-128      | 42    | 81    | 12    | 14    | 34    | 14     | 8         | 40    | 27    | 38     | 181    |
| JNJ-28312141 | 10000 | 10000 | 10000 | 10000 | 10000 | 10000  | 10000     | 10000 | 10000 | 10000  | 10000  |
| JNJ-38877605 | 10000 | 10000 | 10000 | 5249  | 10000 | 8711   | 10000     | 10000 | 10000 | 10000  | 8719   |
| JNJ-7706621  | 10000 | 10000 | 6458  | 5249  | 10000 | 3716   | 5612      | 5496  | 10000 | 2189   | 5266   |
| JNK II       | 50000 | 46104 | 0     | 26125 | 50000 | 6942   | 0         | 50000 | 50000 | 18380  | 0      |
| KI-20227     | 10000 | 10000 | 10000 | 10000 | 10000 | 10000  | 10000     | 10000 | 10000 | 10000  | 10000  |
| KN92         | 10000 | 10000 | NA    | 10000 | 10000 | 10000  | NA        | 10000 | 10000 | 10000  | NA     |
| KN93         | 10000 | 10000 | NA    | 10000 | 10000 | 10000  | NA        | 10000 | 10000 | 10000  | NA     |
| KU-55933     | 10000 | 10000 | 10000 | 6458  | 10000 | 10000  | 7123      | 10000 | 10000 | 10000  | 10000  |
| KW-2449      | 10000 | 10000 | 10000 | 10000 | 8914  | 10000  | 10000     | 10000 | 10000 | 9121   | 10000  |
| Lapatinib_2  | 10000 | 10000 | 10000 | 10000 | 6608  | 10000  | 5497      | 10000 | 10000 | 10000  | 10000  |
| Lapatinib    | 10000 | 10000 | 7764  | 10000 | 10000 | 10000  | 5207      | 10000 | 10000 | 10000  | 10000  |
| LY294002     | 3169  | 14024 | NA    | 2170  | 2484  | 3002   | NA        | 2844  | 7528  | 991    | NA     |
| LY-333531    | 5130  | 10000 | 9788  | 5624  | 8129  | 4366   | 10000     | 9551  | 3312  | 4468   | 3902   |
| MCGD-265     | 10000 | 10000 | 10000 | 10000 | 10000 | 5755   | 2863      | 10000 | 10000 | 10000  | 7619   |
| MK-2206      | 10000 | 10000 | 10000 | 10000 | 10000 | 10000  | 339       | 10000 | 10000 | 10000  | 10000  |
| MLN-120B     | 5000  | 5000  | 5000  | 5000  | 5000  | 5000   | 5000      | 5000  | 5000  | 5000   | 5000   |
| MLN-518      | 10000 | 10000 | NA    | 10000 | 10000 | 10000  | NA        | 10000 | 10000 | 10000  | NA     |
| MLN-8054     | 9334  | 3803  | 10000 | 10000 | 8914  | 3982   | 10000     | 10000 | 10000 | 1779   | 10000  |



|              | UDLPS | WDLPS |       |       |       | DDLPS  |           |       |       | MLPS   | PLPS   |
|--------------|-------|-------|-------|-------|-------|--------|-----------|-------|-------|--------|--------|
| Drug Name    | SW872 | T449  | T1000 | T778  | GOT-3 | LPS141 | FU-DDLS-1 | LP6   | SA-4  | MLS402 | LiSa-2 |
| SKI-606      | 10000 | 10000 | 10000 | 10000 | 10000 | 4899   | 10000     | 10000 | 10000 | 1906   | 10000  |
| Sorafenib_2  | 10000 | 10000 | NA    | 10000 | 10000 | 10000  | NA        | 10000 | 10000 | 10000  | NA     |
| Sorafenib_3  | 10000 | 10000 | 10000 | 10000 | 10000 | 10000  | 6628      | 10000 | 10000 | 6458   | 10000  |
| Sorafenib    | 10000 | 10000 | 10000 | 10000 | 10000 | 10000  | 6545      | 10000 | 10000 | 10000  | 10000  |
| Staurosporin | 61    | 408   | NA    | 6     | 28    | 13     | NA        | 66    | 526   | 6      | NA     |
| STO609       | 10000 | 10000 | 10000 | 10000 | 10000 | 10000  | 10000     | 10000 | 10000 | 10000  | 10000  |
| SU11274      | 10000 | 10000 | 10000 | 10000 | 10000 | 10000  | 10000     | 10000 | 10000 | 10000  | 10000  |
| Sunitinib_2  | 1000  | 1000  | 1000  | 1000  | 1000  | 1000   | 1000      | 1000  | 1000  | 1000   | 1000   |
| Sunitinib_3  | 1000  | 1000  | 1000  | 1000  | 1000  | 1000   | 1000      | 1000  | 1000  | 1000   | 1000   |
| Sunitinib    | 1000  | 1000  | 1000  | 1000  | 1000  | 1000   | 1000      | 1000  | 1000  | 1000   | 1000   |
| TG-100-115   | 10000 | 10000 | 10000 | 10000 | 10000 | 10000  | 10000     | 10000 | 10000 | 10000  | 10000  |
| TG-101348    | 10000 | 2631  | NA    | 3021  | 1951  | 3021   | NA        | 3163  | 10000 | 2189   | NA     |
| Vargetef     | 10000 | 10000 | 4269  | 10000 | 5889  | 10000  | 10000     | 10000 | 10000 | 10000  | 10000  |
| Velcade      | 709   | 2090  | 62    | 956   | 618   | 777    | 137       | 2189  | 1001  | 408    | 200    |
| VX-680       | 2693  | 1779  | 5302  | 1480  | 2952  | 1024   | 7288      | 8512  | 8129  | 84     | 5360   |
| VX-745       | 7414  | 10000 | 10000 | 10000 | 10000 | 10000  | 9170      | 10000 | 10000 | 4075   | 10000  |
| XAV-939      | 10000 | 10000 | 10000 | 10000 | 10000 | 10000  | 1144      | 10000 | 10000 | 8914   | 10000  |
| XL184        | 10000 | 9121  | 5950  | 6027  | 9334  | 3468   | 10000     | 10000 | 10000 | 6458   | 1407   |
| XL-880       | 2189  | 1381  | 1144  | 1779  | 978   | 956    | 4194      | 1951  | 4075  | 1951   | 1114   |
| YM-155       | 23    | 445   | 62    | 415   | 257   | 61     | 6         | 45    | 164   | 21     | 71     |
| ZD-6474      | 10000 | 10000 | 10000 | 10000 | 10000 | 10000  | 8563      | 10000 | 10000 | 10000  | 10000  |

Table S1B: Sequences of shRNA's oligos and CRISPR sgRNA's oligos

| PTK2 shRNA1 | CCGGTCGAATGATAAGGTGTACTCGAGTACACCTTATCATTGACCGGTTTTTG       |
|-------------|-------------------------------------------------------------|
| PTK2 shRNA2 | CCGGGCCAGGTTTACTGAACTTAACTCGAGTTAAGTTCAGTAAACCTGGGCTTTTTG   |
| PTK2 shRNA3 | CCGGCCCAGGAGAGAATGAAGCAAACCTCGAGTTTGCTTCATTCTCTCCTGGGTTTTTG |
| KIT shRNA1  | CCGGCCTTTGTGTTTCTATTGACTTCTCGAGAAGTCAATAGAAACACAAAGGTTTTTG  |
| KIT shRNA2  | CCGGACCATTCTGTGCGGATCAATTCTCGAGAATTGATCCGCACAGAATGGTTTTTTG  |
| KIT shRNA3  | CCGGAGTAGATTAAGAGCCATATAACTCGAGTTATATGGCTCTTAATCTACTTTTTTG  |
| PTK2 sgRNA1 | TCTGATGATAAATGACTGCG                                        |
| PTK2 sgRNA2 | AATCAGTTACCTAACGGACA                                        |
| KIT sgRNA1  | GCCTAATCTCGTCGCCACG                                         |
| KIT sgRNA2  | TGACCAATTATTCCCTCAAG                                        |

Table S1C: List of antibodies

| <b>Antibody</b>              | <b>Company</b>  |
|------------------------------|-----------------|
| Phospho-ERK (E-4)            | Santa Cruz      |
| ERK 1/2 (MK1)                | Santa Cruz      |
| Phospho-Akt (Thr308) (L32A4) | Cell Signalling |
| Akt (pan) (C67E7)            | Cell Signalling |
| GAPDH (14C10)                | Cell Signalling |
| $\beta$ -Actin               | Sigma           |
| Total cKIT                   | Cell Signalling |
| Phospho-cKIT Y719            | Cell Signalling |
| Total STAT3                  | Cell Signalling |
| Phospho-STAT3                | Cell Signalling |
| Total MTOR                   | Cell Signalling |
| Phospho-MTOR                 | Cell Signalling |
| Total P70S6K                 | Cell Signalling |
| Phospho-P70S6K               | Cell Signalling |
| CyclinD                      | Cell Signalling |
| CDK4                         | Cell Signalling |
| Total RB                     | Cell Signalling |
| Phospho RB                   | Cell Signalling |
| Phospho BAD                  | Cell Signalling |
| BAX                          | Cell Signalling |
| BCL-XL                       | Cell Signalling |
| Total caspase 9              | Cell Signalling |
| Cleaved caspase 9            | Cell Signalling |
| MCL-1                        | Cell Signalling |



Table S1D: Results of MTS proliferation assay using RNAi screening assay

| siRNA Gene Target | Undifferentiated liposarcoma |                |                   |                |                   |                |                   |                | Well-differentiated liposarcoma |                |                   |                |                   |                |                   |                | Dedifferentiated liposarcoma |                |                   |                |                   |                |                   |                | Myxoid liposarcoma |                |                   |                | Pleomorphic liposarcoma |                |                   |                |     |  |  |  |        |  |  |  |       |  |  |  |
|-------------------|------------------------------|----------------|-------------------|----------------|-------------------|----------------|-------------------|----------------|---------------------------------|----------------|-------------------|----------------|-------------------|----------------|-------------------|----------------|------------------------------|----------------|-------------------|----------------|-------------------|----------------|-------------------|----------------|--------------------|----------------|-------------------|----------------|-------------------------|----------------|-------------------|----------------|-----|--|--|--|--------|--|--|--|-------|--|--|--|
|                   | SW872                        |                |                   |                | T449              |                |                   |                | T1000                           |                |                   |                | T778              |                |                   |                | GOT-3                        |                |                   |                | LP5141            |                |                   |                | FU-DDLS-1          |                |                   |                | LP6                     |                |                   |                | SA4 |  |  |  | MLS402 |  |  |  | LSa-2 |  |  |  |
|                   | Average viability            | Standard Error | Average viability | Standard Error | Average viability | Standard Error | Average viability | Standard Error | Average viability               | Standard Error | Average viability | Standard Error | Average viability | Standard Error | Average viability | Standard Error | Average viability            | Standard Error | Average viability | Standard Error | Average viability | Standard Error | Average viability | Standard Error | Average viability  | Standard Error | Average viability | Standard Error | Average viability       | Standard Error | Average viability | Standard Error |     |  |  |  |        |  |  |  |       |  |  |  |
| ABL1              | 97                           | 6              | 84                | 2              | 99                | 3              | 79                | 3              | 88                              | 1              | 97                | 7              | 99                | 3              | 68                | 1              | 97                           | 3              | 82                | 4              | 95                | 4              | 95                | 5              | 82                 | 4              | 95                | 4              | 95                      | 4              | 95                | 5              |     |  |  |  |        |  |  |  |       |  |  |  |
| ABL2              | 103                          | 3              | 72                | 4              | 101               | 0              | 98                | 8              | 91                              | 5              | 95                | 2              | 94                | 2              | 113               | 7              | 104                          | 7              | 101               | 14             | 103               | 1              | 103               | 1              | 101                | 14             | 103               | 1              | 103                     | 1              | 103               | 1              |     |  |  |  |        |  |  |  |       |  |  |  |
| TNK2              | 101                          | 6              | 99                | 1              | 102               | 1              | 104               | 6              | 99                              | 8              | 103               | 3              | 102               | 1              | 97                | 3              | 94                           | 7              | 102               | 5              | 102               | 2              | 102               | 2              | 102                | 5              | 102               | 2              | 102                     | 2              | 102               | 2              |     |  |  |  |        |  |  |  |       |  |  |  |
| ALK               | 95                           | 4              | 108               | 6              | 98                | 2              | 114               | 5              | 104                             | 2              | 109               | 5              | 101               | 2              | 78                | 3              | 98                           | 1              | 100               | 5              | 97                | 1              | 100               | 5              | 97                 | 1              | 100               | 5              | 97                      | 1              | 100               | 5              |     |  |  |  |        |  |  |  |       |  |  |  |
| AXL               | 115                          | 4              | 100               | 1              | 101               | 1              | 106               | 3              | 99                              | 5              | 98                | 5              | 97                | 1              | 84                | 2              | 95                           | 7              | 105               | 7              | 101               | 1              | 101               | 1              | 101                | 1              | 101               | 1              | 101                     | 1              | 101               | 1              |     |  |  |  |        |  |  |  |       |  |  |  |
| BLK               | 100                          | 4              | 116               | 3              | 102               | 1              | 93                | 4              | 101                             | 0              | 106               | 4              | 99                | 1              | 122               | 2              | 90                           | 2              | 99                | 7              | 96                | 3              | 96                | 3              | 96                 | 3              | 96                | 3              | 96                      | 3              | 96                | 3              |     |  |  |  |        |  |  |  |       |  |  |  |
| BMX               | 86                           | 1              | 112               | 4              | 101               | 1              | 102               | 2              | 101                             | 3              | 103               | 4              | 94                | 0              | 106               | 7              | 104                          | 7              | 106               | 5              | 101               | 4              | 101               | 4              | 101                | 4              | 101               | 4              | 101                     | 4              | 101               | 4              |     |  |  |  |        |  |  |  |       |  |  |  |
| BTk               | 88                           | 6              | 94                | 3              | 102               | 2              | 93                | 3              | 112                             | 2              | 101               | 2              | 102               | 0              | 98                | 6              | 97                           | 11             | 84                | 5              | 104               | 2              | 104               | 2              | 104                | 2              | 104               | 2              | 104                     | 2              | 104               | 2              |     |  |  |  |        |  |  |  |       |  |  |  |
| TP53RK            | 103                          | 2              | 97                | 6              | 95                | 0              | 86                | 2              | 104                             | 6              | 97                | 4              | 98                | 2              | 136               | 1              | 104                          | 3              | 100               | 3              | 86                | 1              | 86                | 1              | 86                 | 1              | 86                | 1              | 86                      | 1              | 86                | 1              |     |  |  |  |        |  |  |  |       |  |  |  |
| CSF1R             | 99                           | 3              | 143               | 12             | 98                | 1              | 119               | 5              | 125                             | 12             | 105               | 3              | 104               | 1              | 93                | 2              | 114                          | 2              | 136               | 11             | 115               | 1              | 115               | 1              | 115                | 1              | 115               | 1              | 115                     | 1              | 115               | 1              |     |  |  |  |        |  |  |  |       |  |  |  |
| CSK               | 116                          | 3              | 152               | 9              | 97                | 2              | 105               | 3              | 94                              | 10             | 115               | 12             | 102               | 1              | 115               | 8              | 100                          | 5              | 103               | 6              | 105               | 4              | 105               | 4              | 105                | 4              | 105               | 4              | 105                     | 4              | 105               | 4              |     |  |  |  |        |  |  |  |       |  |  |  |
| DDR1              | 99                           | 5              | 97                | 3              | 102               | 1              | 100               | 11             | 92                              | 3              | 93                | 6              | 95                | 1              | 92                | 3              | 99                           | 12             | 105               | 5              | 95                | 5              | 95                | 5              | 95                 | 5              | 95                | 5              | 95                      | 5              | 95                | 5              |     |  |  |  |        |  |  |  |       |  |  |  |
| DDR2              | 98                           | 3              | 98                | 6              | 100               | 2              | 114               | 1              | 101                             | 2              | 95                | 4              | 97                | 1              | 101               | 5              | 93                           | 6              | 102               | 5              | 99                | 5              | 99                | 5              | 99                 | 5              | 99                | 5              | 99                      | 5              | 99                | 5              |     |  |  |  |        |  |  |  |       |  |  |  |
| STYK1             | 89                           | 3              | 66                | 2              | 98                | 2              | 70                | 9              | 98                              | 1              | 94                | 11             | 102               | 2              | 104               | 3              | 95                           | 3              | 77                | 4              | 88                | 2              | 88                | 2              | 88                 | 2              | 88                | 2              | 88                      | 2              | 88                | 2              |     |  |  |  |        |  |  |  |       |  |  |  |
| EGFR              | 83                           | 7              | 97                | 11             | 101               | 1              | 83                | 3              | 94                              | 3              | 97                | 2              | 102               | 1              | 92                | 3              | 93                           | 6              | 92                | 2              | 96                | 3              | 96                | 3              | 96                 | 3              | 96                | 3              | 96                      | 3              | 96                | 3              |     |  |  |  |        |  |  |  |       |  |  |  |
| EPHA1             | 91                           | 2              | 121               | 9              | 101               | 2              | 95                | 8              | 101                             | 2              | 104               | 7              | 102               | 2              | 81                | 2              | 98                           | 3              | 98                | 2              | 100               | 1              | 100               | 1              | 100                | 1              | 100               | 1              | 100                     | 1              | 100               | 1              |     |  |  |  |        |  |  |  |       |  |  |  |
| EPHA2             | 107                          | 7              | 101               | 8              | 101               | 3              | 86                | 9              | 100                             | 1              | 103               | 9              | 101               | 1              | 96                | 5              | 98                           | 5              | 98                | 3              | 106               | 2              | 106               | 2              | 106                | 2              | 106               | 2              | 106                     | 2              | 106               | 2              |     |  |  |  |        |  |  |  |       |  |  |  |
| EPHA3             | 108                          | 4              | 79                | 6              | 102               | 1              | 82                | 10             | 97                              | 5              | 115               | 12             | 110               | 2              | 88                | 1              | 101                          | 2              | 95                | 4              | 87                | 2              | 87                | 2              | 87                 | 2              | 87                | 2              | 87                      | 2              | 87                | 2              |     |  |  |  |        |  |  |  |       |  |  |  |
| EPHA4             | 96                           | 9              | 102               | 6              | 98                | 1              | 91                | 6              | 102                             | 2              | 100               | 6              | 96                | 3              | 107               | 0              | 102                          | 4              | 91                | 3              | 99                | 3              | 99                | 3              | 99                 | 3              | 99                | 3              | 99                      | 3              | 99                | 3              |     |  |  |  |        |  |  |  |       |  |  |  |
| EPHA7             | 98                           | 8              | 108               | 9              | 98                | 2              | 111               | 11             | 102                             | 6              | 88                | 8              | 87                | 2              | 107               | 4              | 117                          | 8              | 105               | 4              | 103               | 1              | 103               | 1              | 103                | 1              | 103               | 1              | 103                     | 1              | 103               | 1              |     |  |  |  |        |  |  |  |       |  |  |  |
| EPHA8             | 103                          | 2              | 60                | 6              | 104               | 2              | 94                | 4              | 100                             | 3              | 100               | 5              | 106               | 4              | 108               | 2              | 112                          | 5              | 103               | 2              | 97                | 3              | 97                | 3              | 97                 | 3              | 97                | 3              | 97                      | 3              | 97                | 3              |     |  |  |  |        |  |  |  |       |  |  |  |
| EPHB1             | 104                          | 4              | 101               | 16             | 105               | 0              | 112               | 9              | 104                             | 2              | 109               | 11             | 112               | 2              | 79                | 4              | 97                           | 8              | 94                | 4              | 98                | 2              | 98                | 2              | 98                 | 2              | 98                | 2              | 98                      | 2              | 98                | 2              |     |  |  |  |        |  |  |  |       |  |  |  |
| EPHB2             | 92                           | 5              | 138               | 2              | 96                | 4              | 99                | 8              | 98                              | 6              | 100               | 6              | 99                | 2              | 142               | 5              | 106                          | 8              | 93                | 6              | 102               | 5              | 102               | 5              | 102                | 5              | 102               | 5              | 102                     | 5              | 102               | 5              |     |  |  |  |        |  |  |  |       |  |  |  |
| EPHB3             | 103                          | 4              | 113               | 11             | 98                | 4              | 88                | 10             | 97                              | 4              | 112               | 4              | 90                | 1              | 110               | 5              | 109                          | 4              | 104               | 7              | 93                | 5              | 93                | 5              | 93                 | 5              | 93                | 5              | 93                      | 5              | 93                | 5              |     |  |  |  |        |  |  |  |       |  |  |  |
| EPHB4             | 105                          | 7              | 144               | 12             | 100               | 2              | 117               | 3              | 91                              | 3              | 98                | 4              | 104               | 2              | 107               | 1              | 102                          | 10             | 102               | 5              | 107               | 2              | 107               | 2              | 107                | 2              | 107               | 2              | 107                     | 2              | 107               | 2              |     |  |  |  |        |  |  |  |       |  |  |  |
| EPHB6             | 103                          | 7              | 80                | 8              | 105               | 1              | 99                | 5              | 98                              | 8              | 104               | 4              | 97                | 1              | 106               | 7              | 92                           | 5              | 109               | 4              | 106               | 3              | 106               | 3              | 106                | 3              | 106               | 3              | 106                     | 3              | 106               | 3              |     |  |  |  |        |  |  |  |       |  |  |  |
| ERBB2             | 104                          | 6              | 108               | 9              | 98                | 2              | 87                | 3              | 110                             | 3              | 110               | 4              | 102               | 1              | 117               | 0              | 87                           | 2              | 87                | 11             | 93                | 3              | 93                | 3              | 93                 | 3              | 93                | 3              | 93                      | 3              | 93                | 3              |     |  |  |  |        |  |  |  |       |  |  |  |
| ERBB3             | 92                           | 4              | 99                | 12             | 96                | 1              | 84                | 6              | 101                             | 7              | 96                | 5              | 102               | 2              | 107               | 5              | 106                          | 4              | 94                | 6              | 105               | 3              | 105               | 3              | 105                | 3              | 105               | 3              | 105                     | 3              | 105               | 3              |     |  |  |  |        |  |  |  |       |  |  |  |
| ERBB4             | 92                           | 6              | 105               | 8              | 98                | 2              | 94                | 12             | 106                             | 4              | 97                | 6              | 98                | 3              | 94                | 1              | 95                           | 3              | 82                | 7              | 104               | 1              | 104               | 1              | 104                | 1              | 104               | 1              | 104                     | 1              | 104               | 1              |     |  |  |  |        |  |  |  |       |  |  |  |
| FER               | 88                           | 2              | 85                | 7              | 97                | 1              | 89                | 4              | 101                             | 13             | 93                | 10             | 98                | 1              | 74                | 4              | 79                           | 4              | 131               | 3              | 88                | 2              | 88                | 2              | 88                 | 2              | 88                | 2              | 88                      | 2              | 88                | 2              |     |  |  |  |        |  |  |  |       |  |  |  |
| FES               | 86                           | 4              | 95                | 3              | 95                | 2              | 97                | 8              | 102                             | 6              | 91                | 1              | 97                | 3              | 98                | 3              | 91                           | 7              | 104               | 5              | 90                | 6              | 90                | 6              | 90                 | 6              | 90                | 6              | 90                      | 6              | 90                | 6              |     |  |  |  |        |  |  |  |       |  |  |  |
| FGFR1             | 99                           | 6              | 97                | 6              | 94                | 1              | 88                | 8              | 108                             | 3              | 102               | 11             | 92                | 1              | 89                | 3              | 91                           | 2              | 109               | 4              | 100               | 3              | 100               | 3              | 100                | 3              | 100               | 3              | 100                     | 3              | 100               | 3              |     |  |  |  |        |  |  |  |       |  |  |  |
| FGFR2             | 112                          | 4              | 97                | 11             | 100               | 1              | 83                | 7              | 98                              | 4              | 99                | 6              | 85                | 0              | 94                | 4              | 89                           | 3              | 108               | 9              | 99                | 1              | 99                | 1              | 99                 | 1              | 99                | 1              | 99                      | 1              | 99                | 1              |     |  |  |  |        |  |  |  |       |  |  |  |
| FGFR3             | 104                          | 4              | 97                | 10             | 101               | 3              | 96                | 4              | 88                              | 8              | 93                | 2              | 100               | 2              | 102               | 4              | 95                           | 6              | 86                | 1              | 103               | 4              | 103               | 4              | 103                | 4              | 103               | 4              | 103                     | 4              | 103               | 4              |     |  |  |  |        |  |  |  |       |  |  |  |
| FGFR4             | 96                           | 3              | 83                | 12             | 106               | 3              | 97                | 3              | 98                              | 5              | 94                | 1              | 106               | 3              | 100               | 4              | 103                          | 4              | 96                | 5              | 102               | 6              | 102               | 6              | 102                | 6              | 102               | 6              | 102                     | 6              | 102               | 6              |     |  |  |  |        |  |  |  |       |  |  |  |
| FGR               | 103                          | 9              | 72                | 4              | 95                | 5              | 74                | 10             | 108                             | 5              | 87                | 6              | 89                | 1              | 76                | 6              | 101                          | 3              | 93                | 5              | 93                | 6              | 93                | 6              | 93                 | 6              | 93                | 6              | 93                      | 6              | 93                | 6              |     |  |  |  |        |  |  |  |       |  |  |  |
| FLT1              | 114                          | 3              | 98                | 6              | 104               | 4              | 108               | 3              | 104                             | 3              | 99                | 8              | 108               | 2              | 103               | 6              | 106                          | 4              | 107               | 8              | 111               | 2              | 111               | 2              | 111                | 2              | 111               | 2              | 111                     | 2              | 111               | 2              |     |  |  |  |        |  |  |  |       |  |  |  |
| FLT3              | 105                          | 8              | 128               | 5              | 92                | 7              | 99                | 9              | 88                              | 11             | 102               | 7              | 89                | 2              | 124               | 5              | 109                          | 4              | 91                | 9              | 98                | 7              | 98                | 7              | 98                 | 7              | 98                | 7              | 98                      | 7              | 98                | 7              |     |  |  |  |        |  |  |  |       |  |  |  |
| FLT4              | 96                           | 3              | 103               | 1              | 101               | 1              | 93                | 9              | 94                              | 10             | 104               | 5              | 97                | 3              | 85                | 7              | 109                          | 4              | 101               | 8              | 99                | 2              | 99                | 2              | 99                 | 2              | 99                | 2              | 99                      | 2              | 99                | 2              |     |  |  |  |        |  |  |  |       |  |  |  |
| FRK               | 93                           | 3              | 110               | 12             | 99                | 1              | 123               | 11             | 102                             | 5              | 102               | 9              | 101               | 3              | 120               | 4              | 92                           | 1              | 87                | 4              | 98                | 1              | 98                | 1              | 98                 | 1              | 98                | 1              | 98                      | 1              | 98                | 1              |     |  |  |  |        |  |  |  |       |  |  |  |
| FYN               | 104                          | 8              | 92                | 2              | 100               | 4              | 118               | 6              | 101                             | 2              | 92                | 2              | 111               | 0              | 100               | 7              | 107                          | 7              | 119               | 5              | 97                | 10             | 97                | 10             | 97                 | 10             | 97                | 10             | 97                      | 10             | 97                | 10             |     |  |  |  |        |  |  |  |       |  |  |  |
| HCK               | 112                          | 8              | 118               | 2              | 98                | 5              | 101               | 3              | 105                             | 4              | 99                | 4              | 112               | 3              | 123               | 9              | 98                           | 7              | 113               | 4              | 105               | 4              | 105               | 4              | 105                | 4              | 105               | 4              | 105                     | 4              | 105               | 4              |     |  |  |  |        |  |  |  |       |  |  |  |
| IGF1R             | 104                          | 9              | 109               | 7              | 103               | 4              | 103               | 4              | 102                             | 6              | 95                | 8              | 96                | 0              | 95                | 5              | 112                          | 7              | 119               | 8              | 116               | 5              | 116               | 5              | 116                | 5              | 116               | 5              | 116                     | 5              | 116               | 5              |     |  |  |  |        |  |  |  |       |  |  |  |
| INSR              | 114                          | 4              | 106               | 15             | 97                | 3              | 105               | 2              | 115                             | 3              | 96                | 2              | 115               | 1              | 123               | 8              | 106                          | 3              | 126               | 12             | 95                | 4              | 95                | 4              | 95                 | 4              | 95                | 4              | 95                      | 4              | 95                | 4              |     |  |  |  |        |  |  |  |       |  |  |  |
| ITK               | 119                          | 4              | 136               | 16             | 94                | 6              | 114               | 6              | 105                             | 9              | 118               | 8              | 113               | 1              | 143               | 0              | 98                           | 6              | 109               | 8              | 102               | 5              | 102               | 5              | 102                | 5              | 102               | 5              | 102                     | 5              | 102               | 5              |     |  |  |  |        |  |  |  |       |  |  |  |
| JAK1              | 94                           | 3              | 114               | 1              | 103               | 4              | 94                | 11             | 95                              | 2              | 119               | 12             | 80                | 2              | 88                | 3              | 104                          | 2              | 94                | 7              | 95                | 4              | 95                | 4              | 95                 | 4              | 95                | 4              | 95                      | 4              | 95                | 4              |     |  |  |  |        |  |  |  |       |  |  |  |
| JAK2              | 92                           | 3              | 109               | 10             | 86                | 7              | 106               | 5              | 108                             | 7              | 101               | 3              | 101               | 1              | 99                | 4              | 103                          | 6              | 98                | 6              | 101               | 5              | 101               | 5              | 101                | 5              | 101               | 5              | 101                     | 5              | 101               | 5              |     |  |  |  |        |  |  |  |       |  |  |  |
| JAK3              | 90                           | 4              | 102               | 6              | 106               | 3              | 106               | 4              | 103                             | 9              | 90                | 12             | 95                | 0              | 116               | 7              | 94                           | 7              | 96                | 3              | 110               | 6              | 110               | 6              | 110                | 6              | 110               | 6              | 110                     | 6              | 110               | 6              |     |  |  |  |        |  |  |  |       |  |  |  |
| KDR               | 96                           | 4              | 104               | 3              | 101               | 4              | 112               | 6              | 91                              | 9              | 97                | 5              | 96                | 1              | 94                | 8              | 94                           | 4              | 86                | 15             | 91                | 7              | 91                | 7              | 91                 | 7              | 91                | 7              | 91                      | 7              | 91                | 7              |     |  |  |  |        |  |  |  |       |  |  |  |
| KIT               | 91                           | 2              | 49                | 5              | 100               | 3              | 81                | 7              | 74                              | 7              | 101               | 5              | 98                | 1              | 69                | 3              | 95                           | 4              | 29                | 7              | 85                | 4              | 85                | 4              | 85                 | 4              | 85                | 4              | 85                      | 4              | 85                | 4              |     |  |  |  |        |  |  |  |       |  |  |  |
| LMTK2             | 105                          | 3              | 111               | 9              | 100               | 2              | 107               | 9              | 102                             | 3              | 98                | 2              | 100               | 1              | 83                | 2              | 94                           | 5              | 88                | 3              | 105               | 3              | 105               | 3              | 105                | 3              | 105               | 3              | 105                     | 3              | 105               | 3              |     |  |  |  |        |  |  |  |       |  |  |  |
| LOK               | 97                           | 4              | 113               | 7              | 104               | 2              | 90                | 13             | 84                              | 4              | 95</              |                |                   |                |                   |                |                              |                |                   |                |                   |                |                   |                |                    |                |                   |                |                         |                |                   |                |     |  |  |  |        |  |  |  |       |  |  |  |

|                      |     |   |     |    |     |   |     |    |     |    |     |    |     |   |     |    |     |   |     |    |     |   |
|----------------------|-----|---|-----|----|-----|---|-----|----|-----|----|-----|----|-----|---|-----|----|-----|---|-----|----|-----|---|
| TEK                  | 110 | 3 | 86  | 0  | 99  | 1 | 108 | 6  | 101 | 11 | 100 | 3  | 111 | 2 | 90  | 6  | 97  | 6 | 104 | 7  | 107 | 2 |
| TIE                  | 122 | 3 | 96  | 8  | 104 | 1 | 91  | 9  | 98  | 10 | 114 | 9  | 102 | 4 | 145 | 4  | 108 | 6 | 128 | 9  | 106 | 4 |
| TNK1                 | 108 | 6 | 85  | 1  | 97  | 2 | 123 | 9  | 100 | 4  | 96  | 2  | 105 | 0 | 95  | 5  | 106 | 7 | 96  | 6  | 105 | 1 |
| TXK                  | 116 | 3 | 87  | 6  | 95  | 2 | 107 | 6  | 85  | 4  | 79  | 8  | 89  | 3 | 72  | 1  | 109 | 6 | 95  | 6  | 96  | 4 |
| TYK2                 | 84  | 3 | 115 | 2  | 100 | 2 | 107 | 9  | 105 | 4  | 110 | 5  | 112 | 3 | 113 | 5  | 104 | 2 | 91  | 1  | 90  | 1 |
| TYRO3                | 89  | 5 | 102 | 5  | 104 | 1 | 92  | 5  | 98  | 6  | 107 | 3  | 96  | 2 | 92  | 7  | 102 | 9 | 93  | 3  | 94  | 4 |
| YES1                 | 110 | 2 | 88  | 1  | 104 | 1 | 89  | 7  | 111 | 3  | 104 | 11 | 100 | 3 | 89  | 8  | 105 | 5 | 107 | 8  | 98  | 1 |
| ZAP70                | 104 | 0 | 87  | 2  | 99  | 2 | 86  | 3  | 95  | 5  | 111 | 4  | 98  | 1 | 104 | 7  | 87  | 4 | 100 | 5  | 105 | 3 |
| NRAS                 | 111 | 5 | 125 | 3  | 97  | 3 | 134 | 9  | 113 | 4  | 104 | 2  | 101 | 1 | 135 | 7  | 103 | 4 | 126 | 6  | 102 | 3 |
| KRAS                 | 101 | 3 | 88  | 2  | 101 | 1 | 118 | 7  | 106 | 7  | 95  | 4  | 101 | 3 | 99  | 2  | 98  | 3 | 111 | 3  | 100 | 2 |
| EPHA5                | 106 | 2 | 147 | 4  | 104 | 1 | 123 | 10 | 98  | 3  | 119 | 5  | 121 | 2 | 115 | 5  | 105 | 7 | 120 | 0  | 106 | 4 |
| EPHA6                | 90  | 6 | 63  | 9  | 101 | 2 | 42  | 12 | 96  | 4  | 88  | 3  | 86  | 2 | 67  | 7  | 93  | 4 | 81  | 3  | 101 | 1 |
| SRMS                 | 91  | 5 | 86  | 5  | 96  | 0 | 93  | 3  | 88  | 8  | 89  | 3  | 85  | 3 | 81  | 10 | 90  | 7 | 85  | 3  | 98  | 3 |
| AATK                 | 98  | 7 | 106 | 10 | 100 | 3 | 106 | 9  | 113 | 4  | 115 | 1  | 98  | 2 | 100 | 4  | 108 | 5 | 94  | 4  | 98  | 7 |
| LMTK3                | 101 | 0 | 102 | 6  | 97  | 2 | 82  | 5  | 90  | 6  | 95  | 7  | 94  | 1 | 89  | 4  | 100 | 4 | 99  | 6  | 88  | 1 |
| Survivin             | 102 | 4 | 102 | 3  |     |   | 92  | 4  | 94  | 2  | 98  | 8  |     |   | 123 | 7  | 103 | 4 | 81  | 10 |     |   |
| Non-specific control | 91  | 3 | 152 | 5  |     |   | 86  | 7  | 103 | 7  | 96  | 4  |     |   | 143 | 4  | 86  | 3 | 116 | 15 |     |   |
